# Supplementary material for: Regression of renal cell carcinoma by T cell receptor-engineered T cells targeting a human endogenous retrovirus
Source: PubMed Central journal article supplement — J Immunother Cancer. 2024 Aug 19;12(8):e009147. doi: 10.1136/jitc-2024-009147 (PMC11409391; doi:10.1136/jitc-2024-009147), 2024-08-19
Supplement: jitc-12-8-s001.pdf [file jitc-12-8-s001.pdf]

**Supplementary material:**

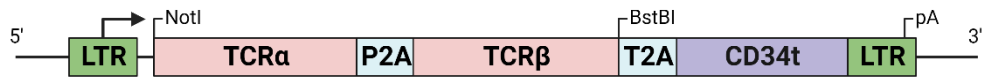

**Supplementary item 1. The HERV-E TCR retroviral construct.** SAMEN CMV/SR $\alpha$  retroviral vector encoding HERV-E TCR.

**A**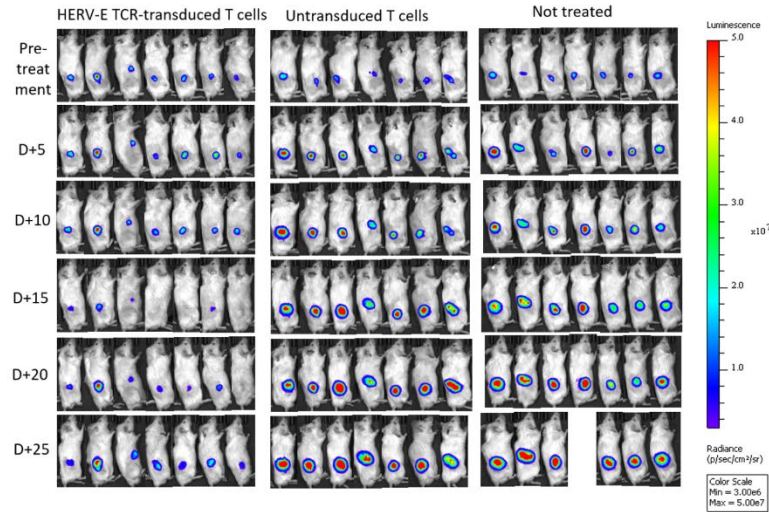**B**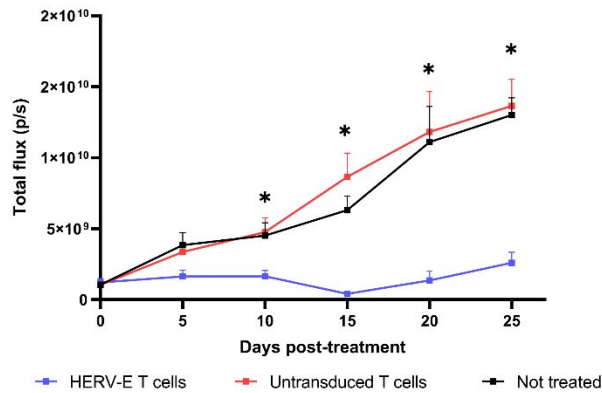**C**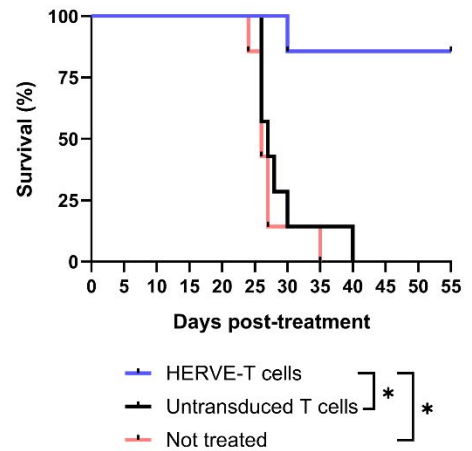

**Supplementary item 2. HERV-E T cells mediate regression of ccRCC tumors in vivo in a tumor bearing mouse model.** NSG mice with established (10 days) luciferase expressing subcutaneous RCC1 WT tumors were treated with a single intravenous injection of either HERV-E T cells, untransduced T cells from the same donor, or did not receive T cells. Tumor burden was evaluated by serial BLI at the indicated timepoints. **(A)** Bioluminescence signal shows tumor burden in each treatment group at indicated timepoints after the T cell injection. **(B)** Bioluminescent quantification of ccRCC tumor burden in mice. Error bars represent the SEM

in the group treated with HERV-E T cells (n=7), in the group treated with untransduced T cells (n=7), and in the mice that did not receive T-cells (n=7; Not treated). **(C)** Kaplan-Meyer survival curves. \* p<0.05

### Supplementary item 3. Purity and viability of HERV-E TCR transduced T cells

**manufactured using GMP conditions.** HERV-E TCR-transduced T cell products were expanded using GMP conditions at full scale from three healthy donors (GMP 1-3) with cell number, viability, and purity (CD34 expression) assessed at multiple time points after thawing.

|                |       | Thawed sample          |                         |                        | Method           |
|----------------|-------|------------------------|-------------------------|------------------------|------------------|
|                |       | 0h                     | 2h                      | 4h                     |                  |
| Cell count     | GMP 1 | 1.34 x 10 <sup>8</sup> | 1.32 x 10 <sup>8</sup>  | 1.29 x 10 <sup>8</sup> | Cellometer-based |
|                | GMP 2 | 7.55 x 10 <sup>8</sup> | 7.39 x 10 <sup>8</sup>  | 6.54 x 10 <sup>8</sup> |                  |
|                | GMP 3 | 6.34 x 10 <sup>9</sup> | 16.11 x 10 <sup>9</sup> | 5.82 x 10 <sup>9</sup> |                  |
| Viability (%)* |       | 94.6 ± 2.5             | 94.3 ± 3.5              | 92 ± 3                 | Trypan Blue      |
| CD34+ (%)*     |       | 96.5 ± 0.4             | n/a                     | n/a                    | Flow Cytometry   |
| Tetramer+ (%)* |       | 92 ± 2.2               | n/a                     | n/a                    | Flow Cytometry   |

\* Data is represented as: Mean ± SD

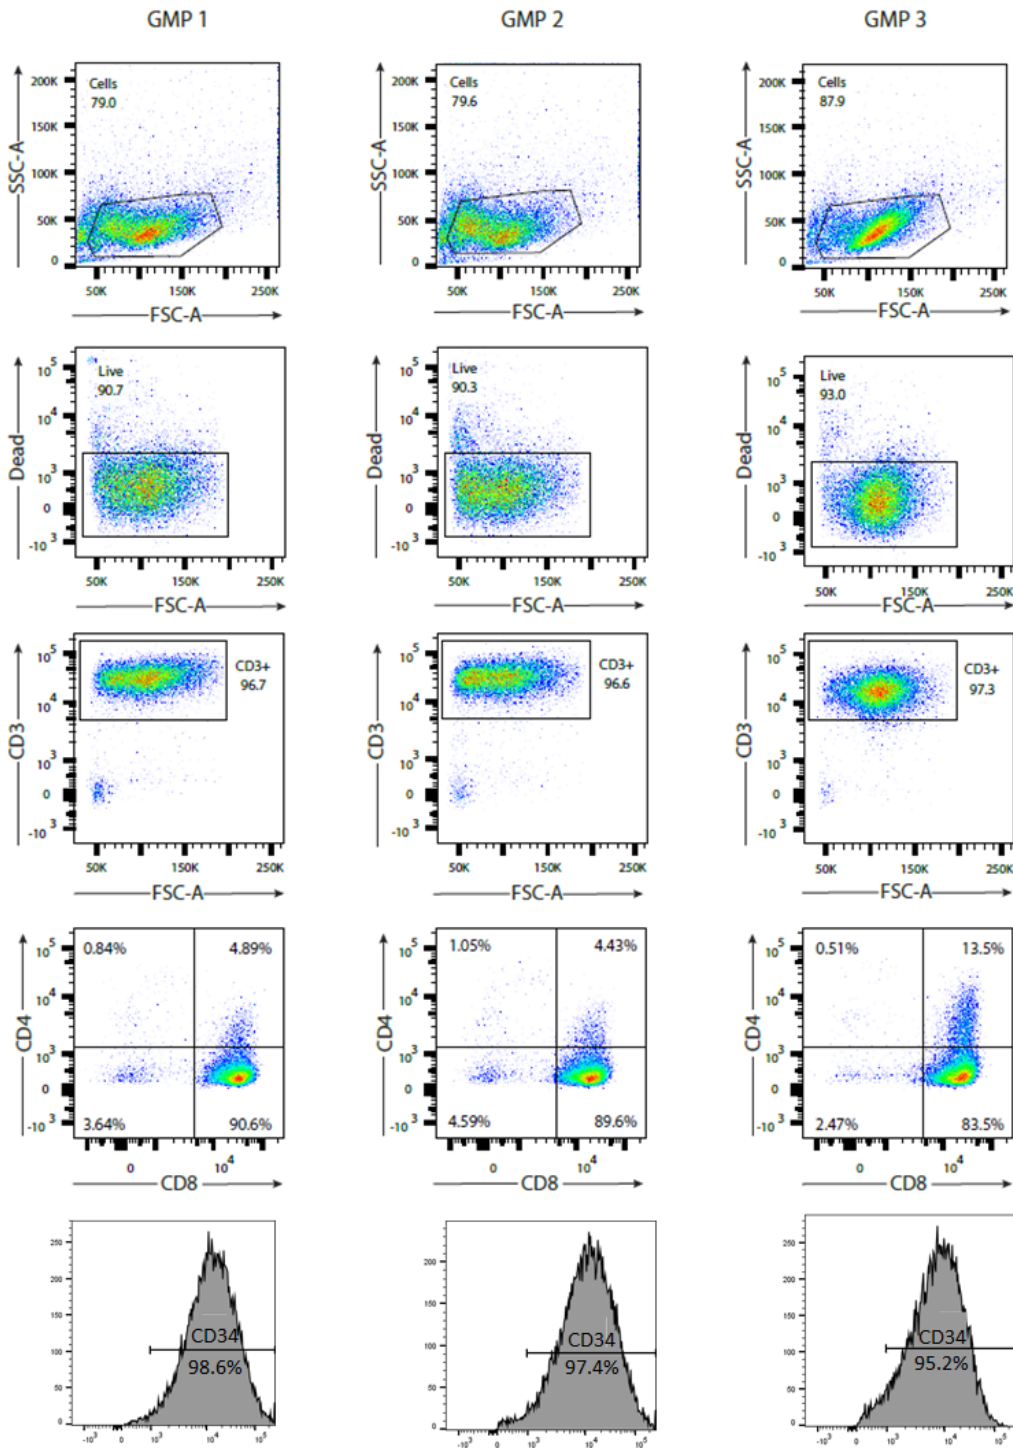

**Supplementary item 4. Scale-up using GMP conditions to manufacture clinical-grade HERV-E TCR T cells and characteristics of transduced cells.** HERV-E T cell final products were manufactured from three healthy donors (GMP 1-3) using GMP conditions and characterized by flow cytometry.
