# Supplementary figures and images for: Regression of renal cell carcinoma by T cell receptor-engineered T cells targeting a human endogenous retrovirus
Source: PubMed Central journal article supplement — J Immunother Cancer. 2024 Aug 19;12(8):e009147. doi: 10.1136/jitc-2024-009147 (PMC11409391; doi:10.1136/jitc-2024-009147), 2024-08-19

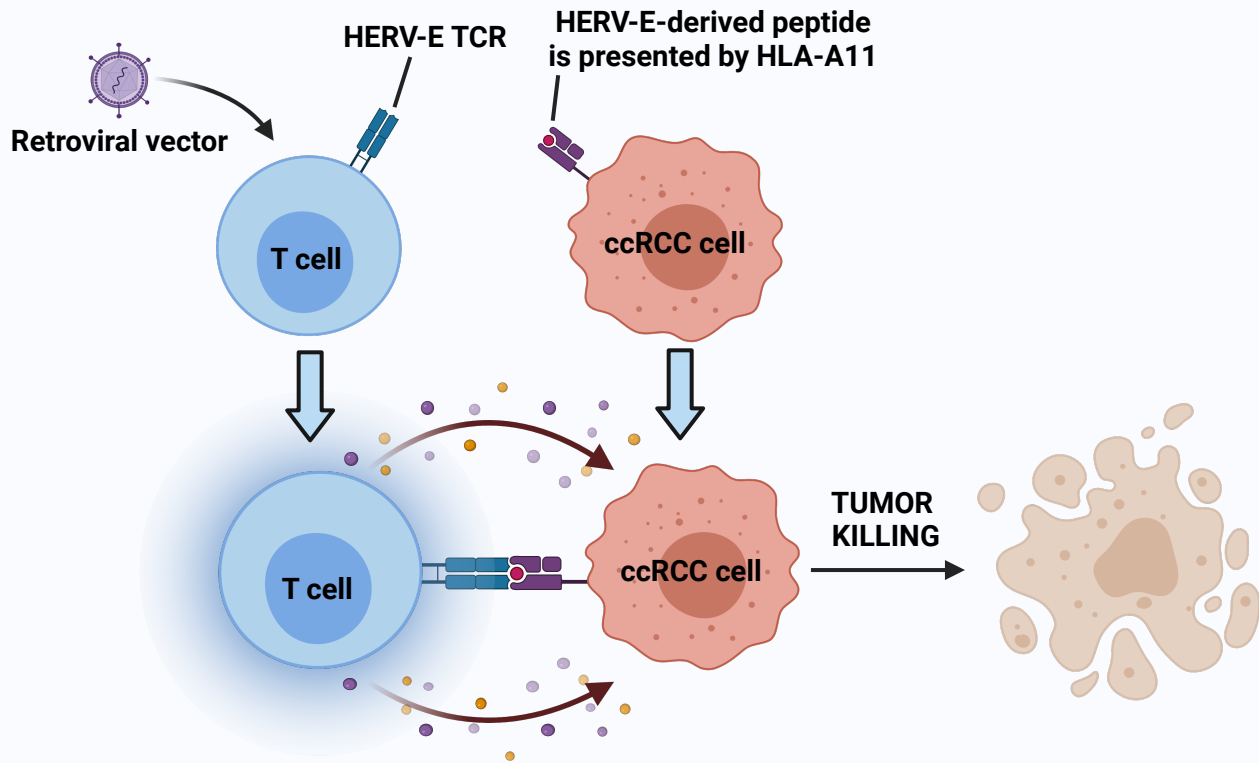

Supplement: jitc-12-8-s002.pdf [file jitc-12-8-s002.pdf]
